# Supplementary material for: Live imaging of endogenous protein dynamics in zebrafish using chromobodies
Source: Oxford University Press journal article supplement (doi:10.1242/dev.118943), 2015-05-12
Supplement: dev118943supp.pdf [file dev118943supp.pdf]

**Panza et al. - Live imaging of endogenous protein dynamics in zebrafish using chromobodies**

**Supplementary Information**

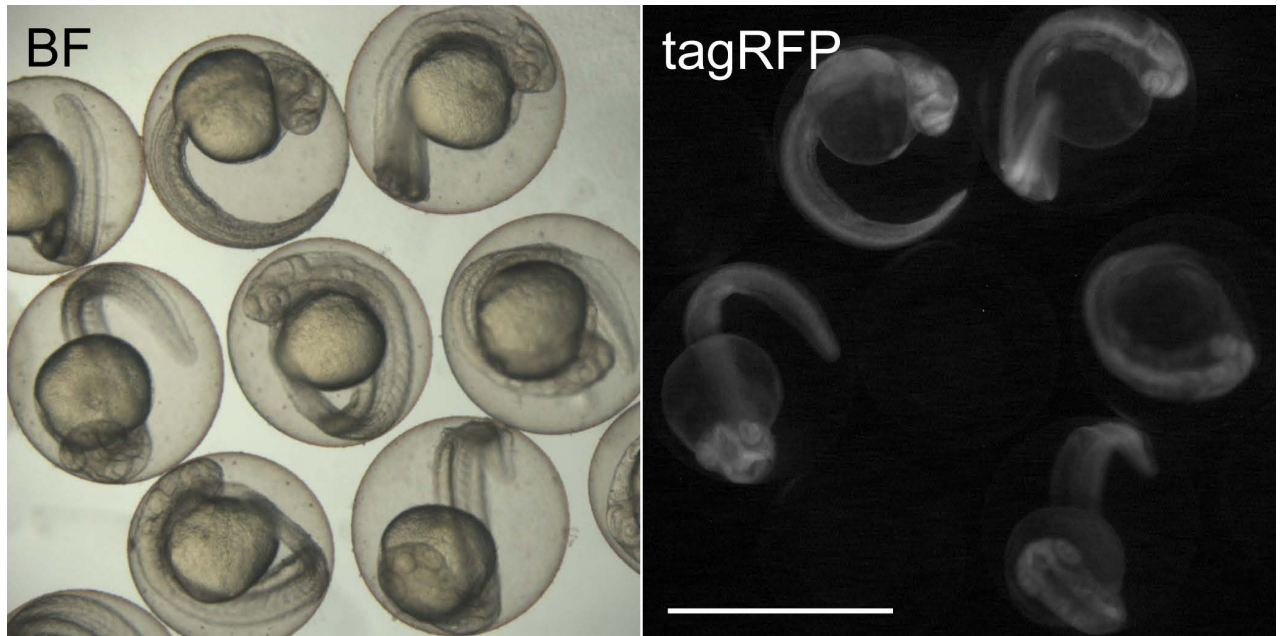

**Supplementary Figure 1. Effect of chromobody induction by heat-shock in 24 hpf *hsp70l:PCNA-CB* transgenic embryos.**

30 hpf embryos heat-shocked at 24 hpf. Ubiquitous fluorescence can be detected after induction. Transgenic embryos appear morphologically similar to non-transgenic siblings, indicating that chromobody expression is well tolerated *in vivo*. BF: brightfield. Scale bar: 1 mm.

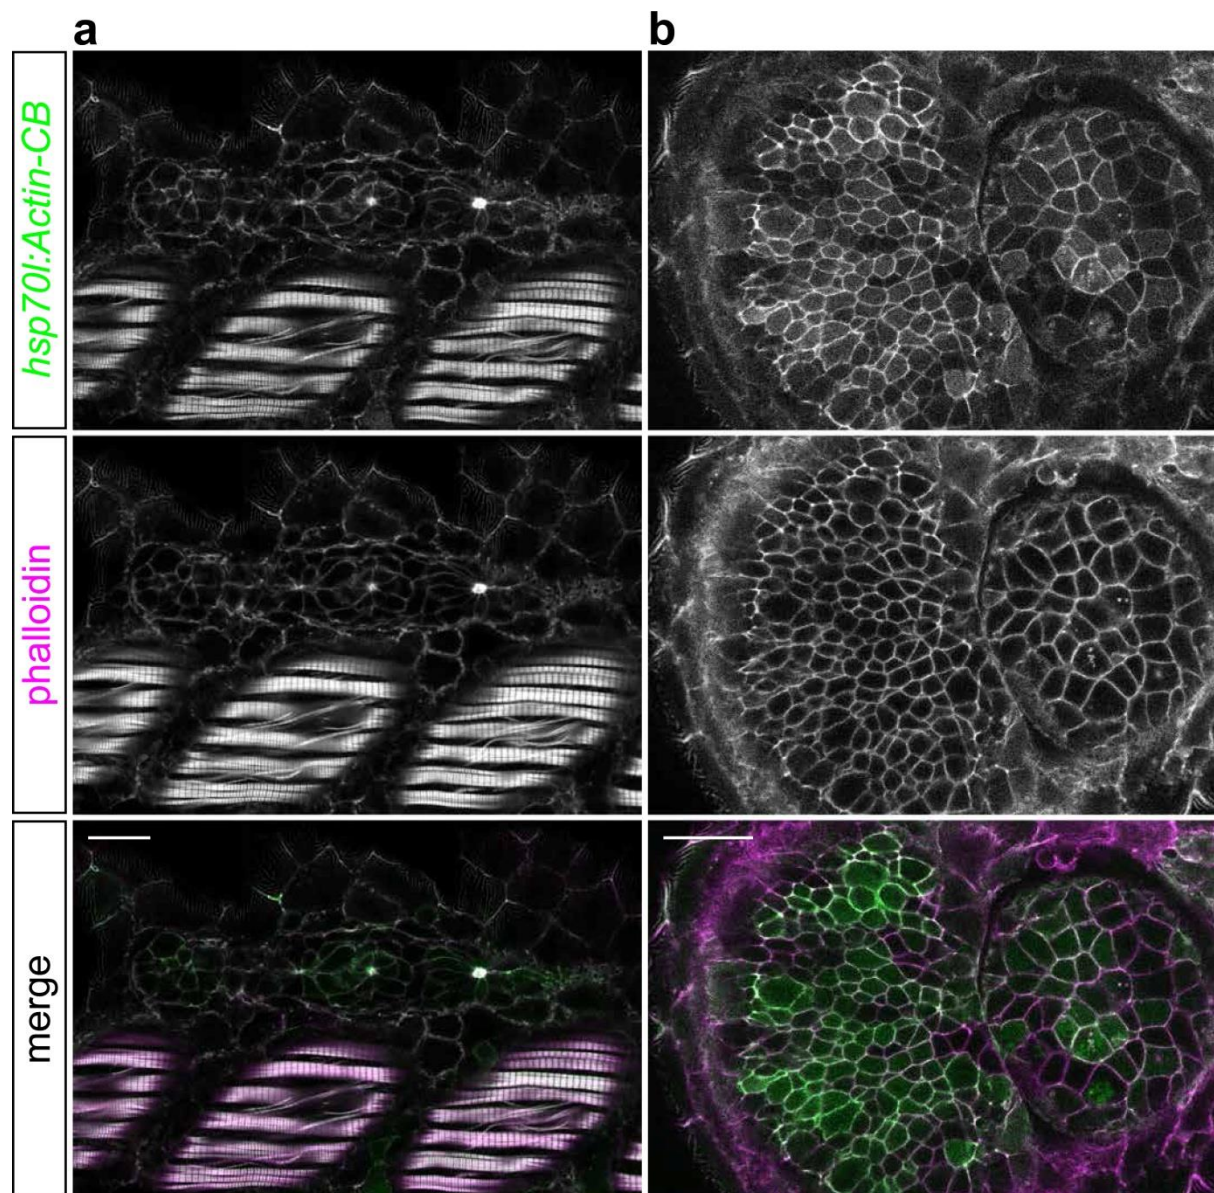

**Supplementary Figure 2. Actin-CB colocalizes with zebrafish F-actin *in vivo*.**

36 hpf *hsp70l:Actin-CB* embryos heat-shocked at 24 hpf and counterstained with rhodamine phalloidin. **(a)** Actin-CB fluorescence overlaps F-actin staining in muscle fibres, epidermal cells and in the apically-constricted centres of pLLP rosettes (similar to what has been described in Xu et al., 2014). **(b)** Actin-CB recognized cortical F-actin in cells of the retina and lens. Scale bars: 20  $\mu$ m.



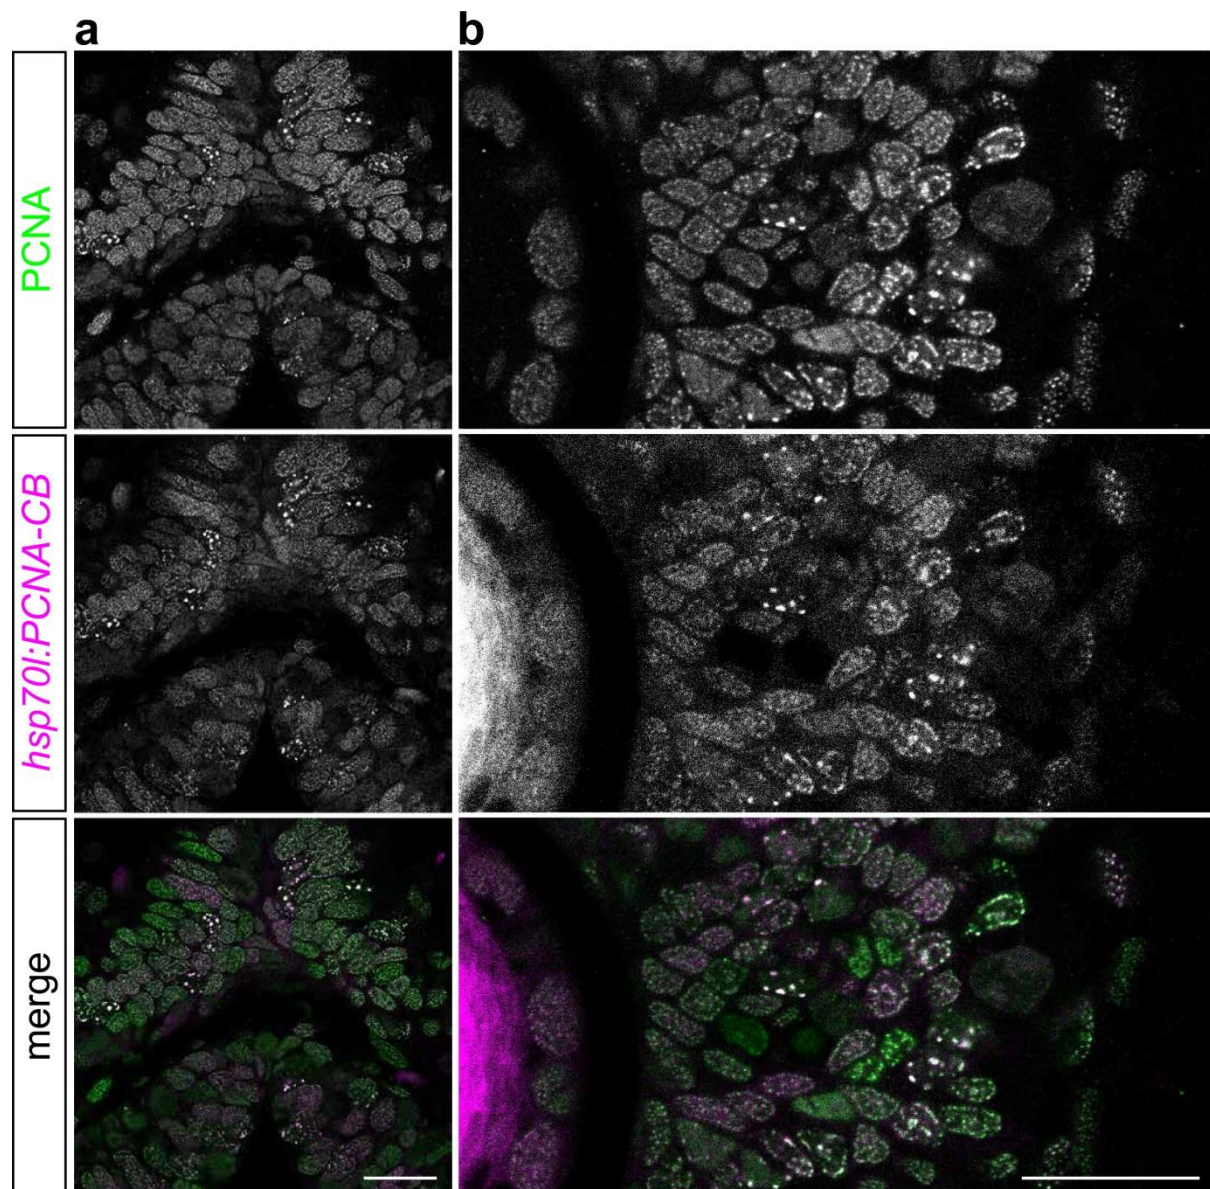

**Supplementary Figure 3. PCNA-CB colocalizes with endogenous zebrafish PCNA *in vivo*.**

36 hpf *hsp70l:PCNA-CB* embryos heat-shocked at 24 hpf and counterstained using an anti-PCNA antibody. PCNA-CB localizes to nuclear structures that contain endogenous PCNA protein in the dorsal midbrain (**a**) and retina (**b**). Scale bars: 20  $\mu$ m.

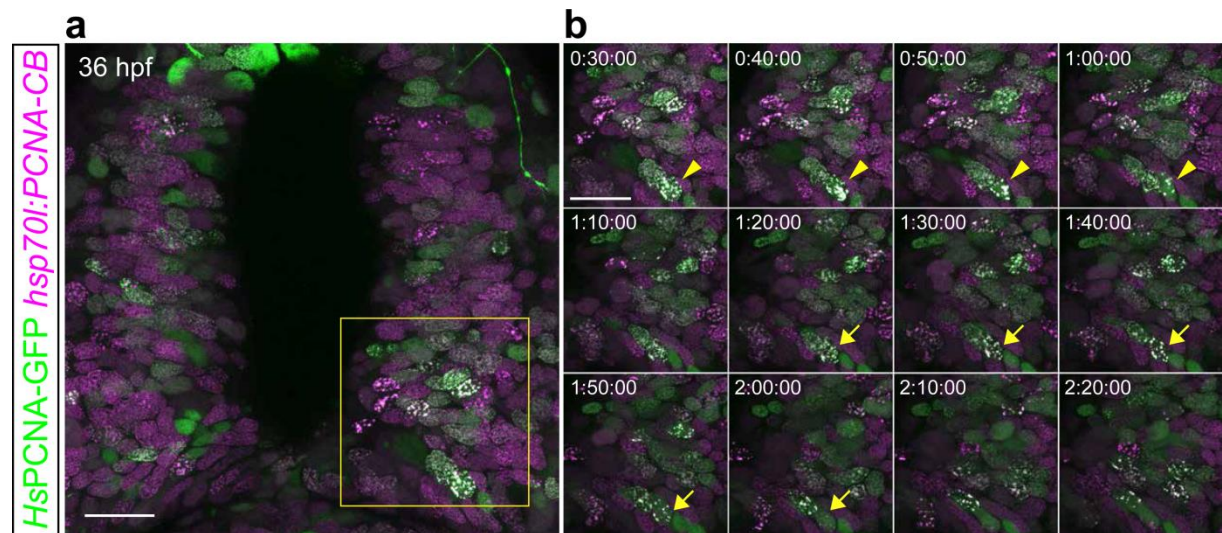

**Supplementary Figure 4. PCNA-CB and human PCNA-GFP dynamically colocalize when expressed in live zebrafish.**

36 hpf *hsp70l:PCNA-CB* embryos transiently expressing human PCNA-GFP from an injected DNA construct. **(a)** Overview of the scanned area. **(b)** Detailed time lapse analysis. Live imaging of animals heat-shocked at 24 hpf shows that PCNA-CB and human PCNA-GFP mark the same nuclear structures and their pattern is characteristic of S phase. Additionally, both fluorescent fusions can trace these structures' dynamics (**arrowheads** and **arrows** indicate two different cells over time). Scale bars: 20  $\mu$ m. Timestamps: h:min:s.

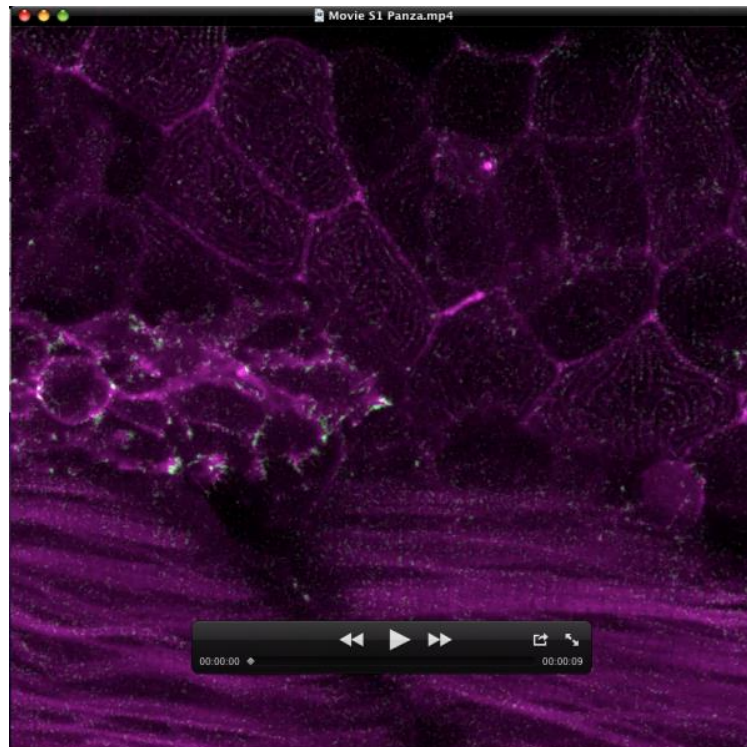

**Supplementary Movie 1. Actin dynamics at the leading edge of posterior lateral line primordium (pLLP) cells during migration.**

Time-lapse video of the migrating lateral line primordium in a 36 hpf *hsp70l:Actin-CB* embryo. Fast actin reorganization can be traced in cells at the posterior and lateral margin of the primordium. Magenta: signal from time frame  $t+1$ . Green: signal obtained from the subtraction of frame  $t$  from  $t+1$ . Green signal highlights the appearance of actin-CB signal from frame to frame.

Total duration of imaging: 22 min 30 s. Interval between consecutive frames: 7 s.

Objective: Zeiss LD C-Apochromat 40x/1.1 W Korr M27. Zoom: 2x. Pixel size: 0.107  $\mu\text{m}$ .

Dimensions: 996x996 pixels.



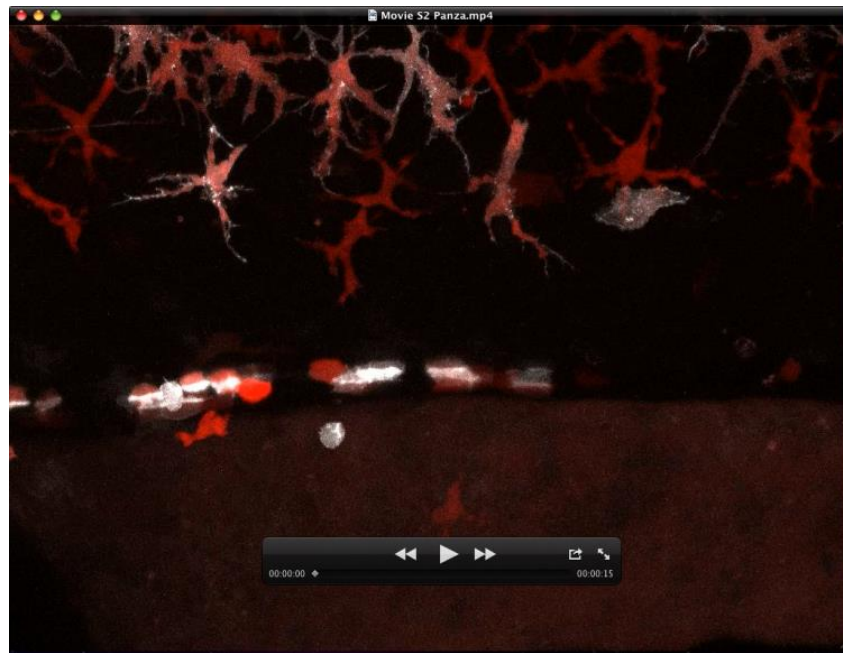

**Supplementary Movie 2. Remodelling of actin-based cytoskeletal elements in embryonic xanthophores.**

Extension and retraction of actin-rich filopodial projections in xanthophores of a *csf1ra:gal4;UAS:NTR-mcherry* (red); *UAS:Actin-CB* (white) embryo. Imaging was conducted from 30 hpf to 40.5 hpf with 8 min intervals.

Objective: Zeiss LD C-Apochromat 40x/1.1 W Korr M27. Zoom: 0.6x. Pixel size: 0.346  $\mu\text{m}$ .

Dimensions before editing: 1024x1024 pixels.

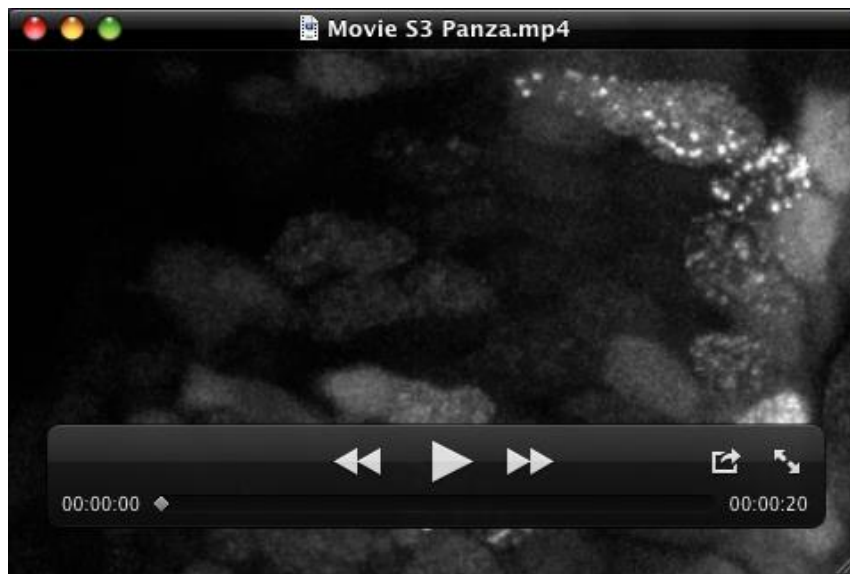

**Supplementary Movie 3. Following endogenous PCNA localization shifts during cell cycle progression using chromobodies.**

Detail from the dorsal midbrain of a *wnt1:gal4;UAS:PCNA-CB* (white) embryo. The localization dynamics of endogenous PCNA is traced by fluorescent chromobodies and mirrors the reported patterns described in mammalian cells (Leonhardt et al., 2000; Essers et al., 2005).

Imaging was carried out from 30 hpf to 43.3 hpf with 10 min intervals.

Objective: Zeiss LD C-Apochromat 40x/1.1 W Korr M27. Zoom: 0.8x. Pixel size: 0.259  $\mu\text{m}$ .

Dimensions before editing: 1024x1024 pixels.

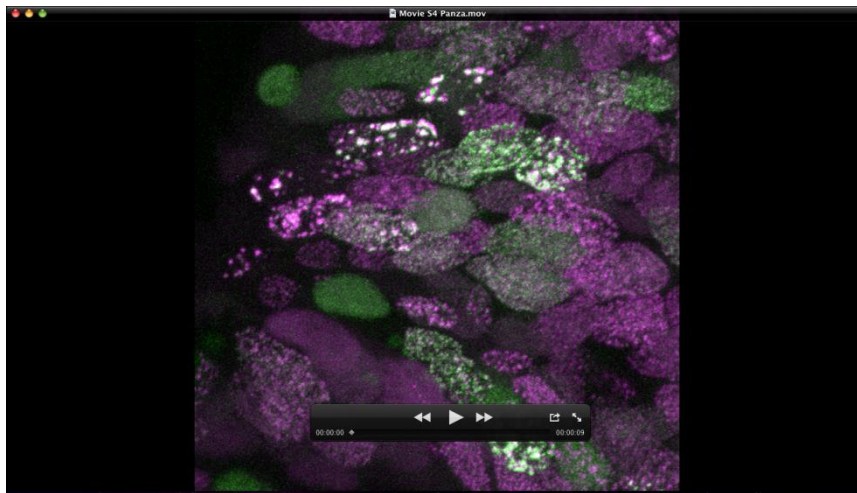

**Supplementary Movie 4. Comparison between PCNA-CB and human PCNA-GFP during S phase progression.**

Detail from the dorsal midbrain of a *hsp70l:PCNA-CB* embryo after transgenic expression (magenta) was induced at 24 hpf. This animal additionally shows expression of exogenous human PCNA-GFP (green) from an injected plasmid. The two fusion proteins dynamically colocalize in nuclear foci during S phase.

Imaging was carried out from 36 hpf to approximately 39 hpf with 10 min intervals.

Objective: Zeiss LD C-Apochromat 40x/1.1 W Korr M27. Zoom: 1.5x. Pixel size: 0.105  $\mu\text{m}$ .

Dimensions before editing: 1348x1348 pixels.



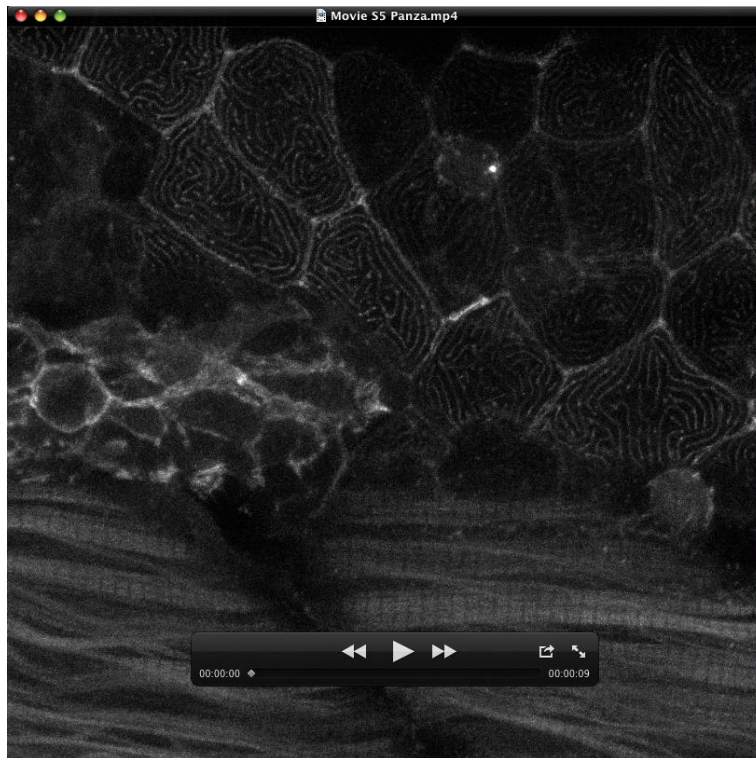

**Supplementary Movie 5.** As in Supplementary Movie 1, unprocessed.

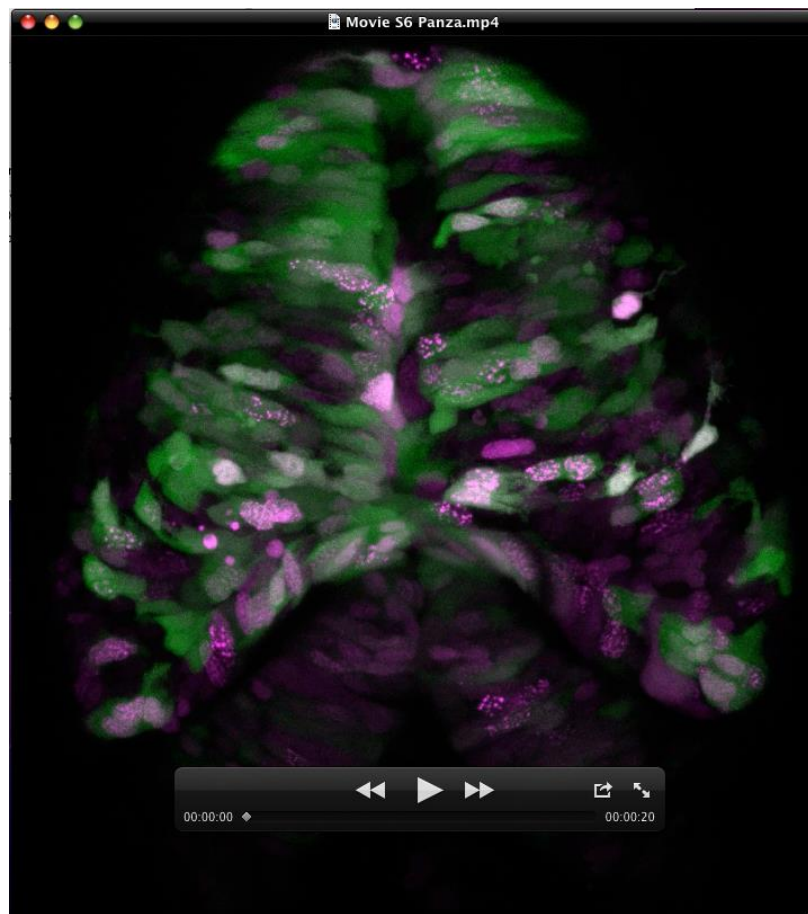

**Supplementary Movie 6.** As in Supplementary Movie 3, unprocessed.
